# Supplementary material
Source: MDPI journal article supplement (https://www.mdpi.com/2311-5637/8/4/182)
Supplement: s1 [file s1 › fermentation-1635600-supplementary.pdf]

**Figure S1:** Effect of fermented wheat on histology of vital organs. All the slides were photographed at 10× and 40× magnifications

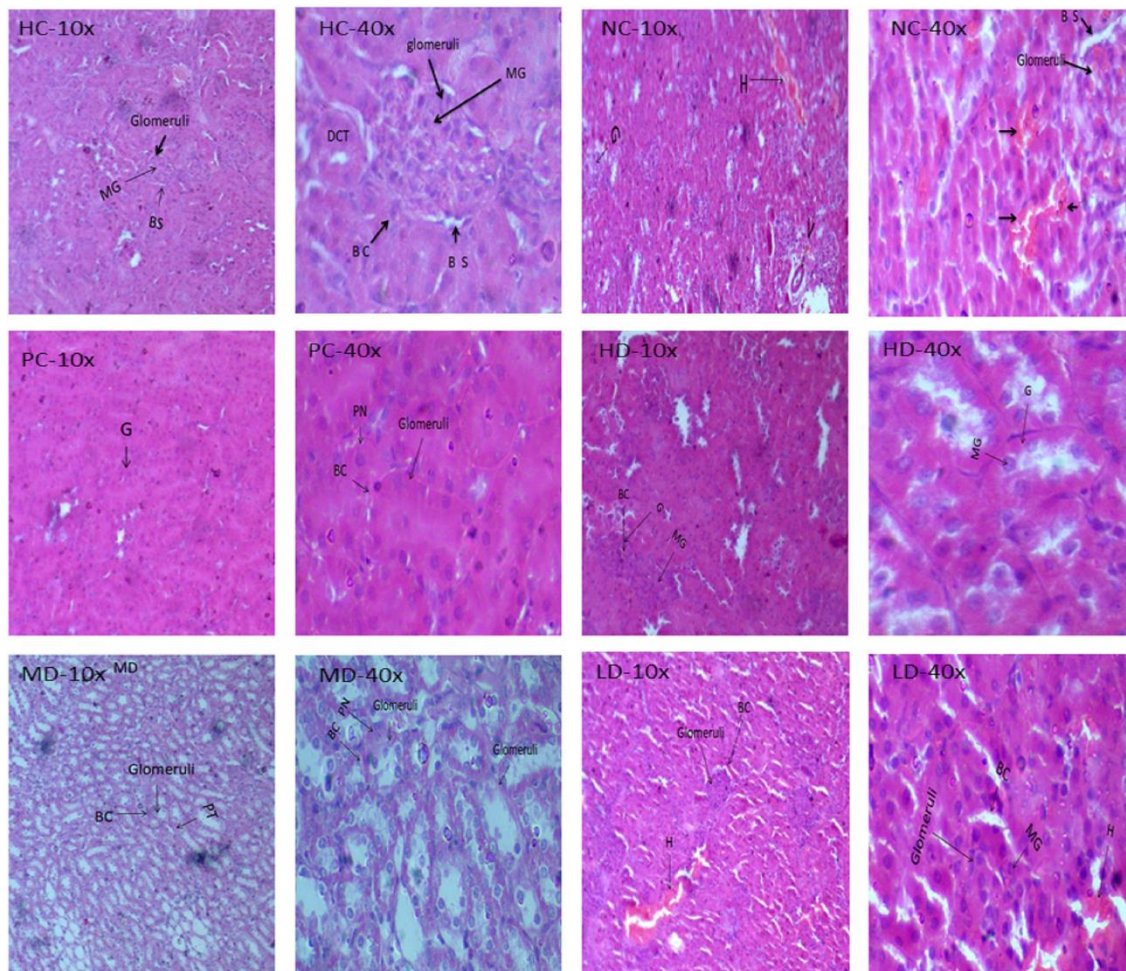

Histology of kidney

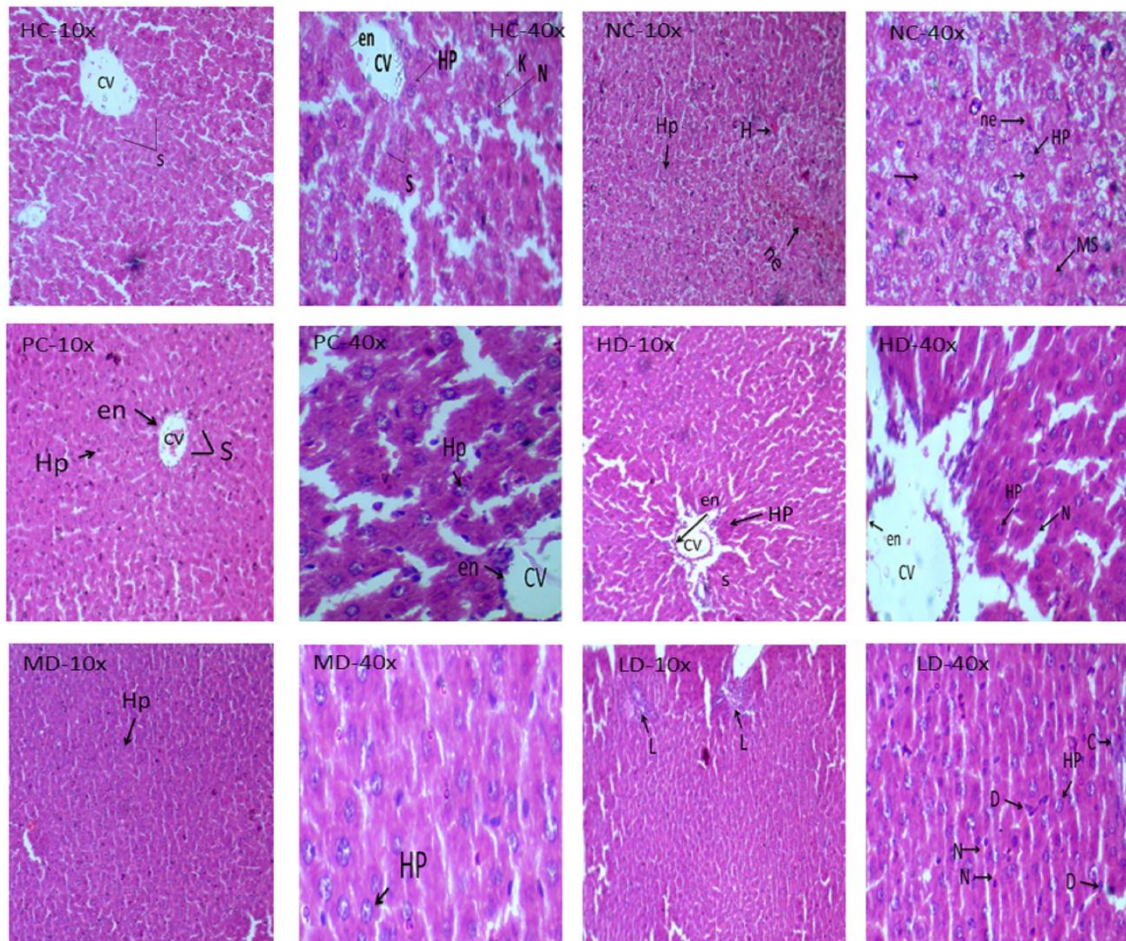

Histology of liver



Histology of pancreas

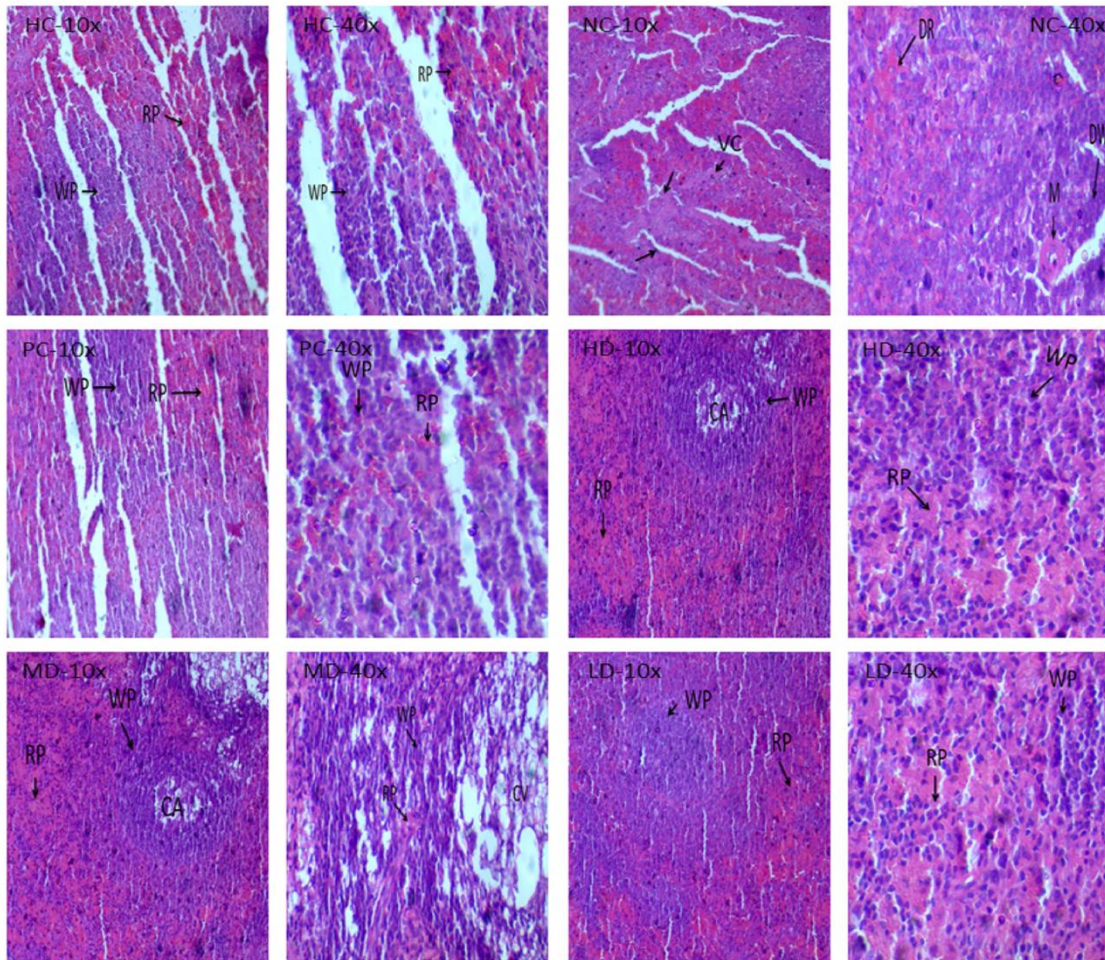

Histology of spleen

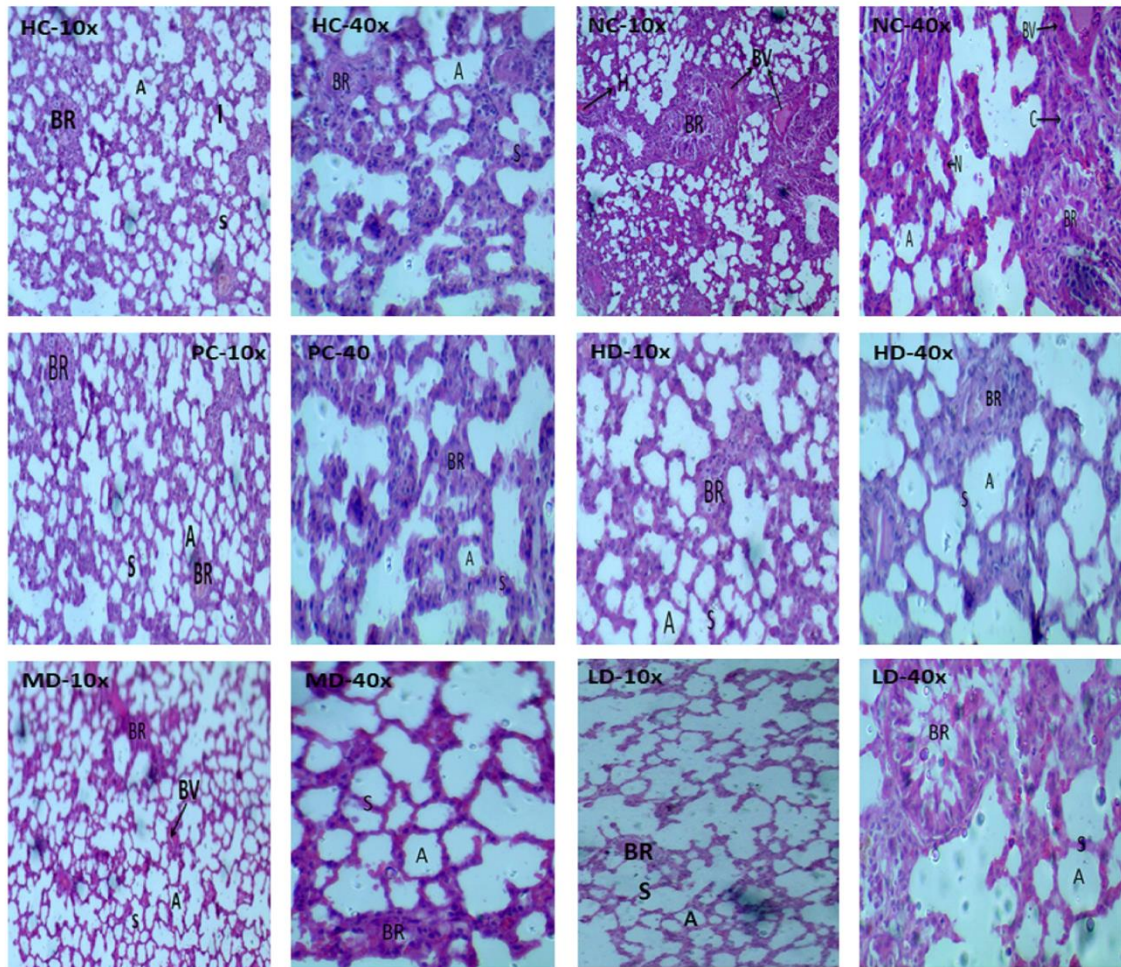

Histology of lung

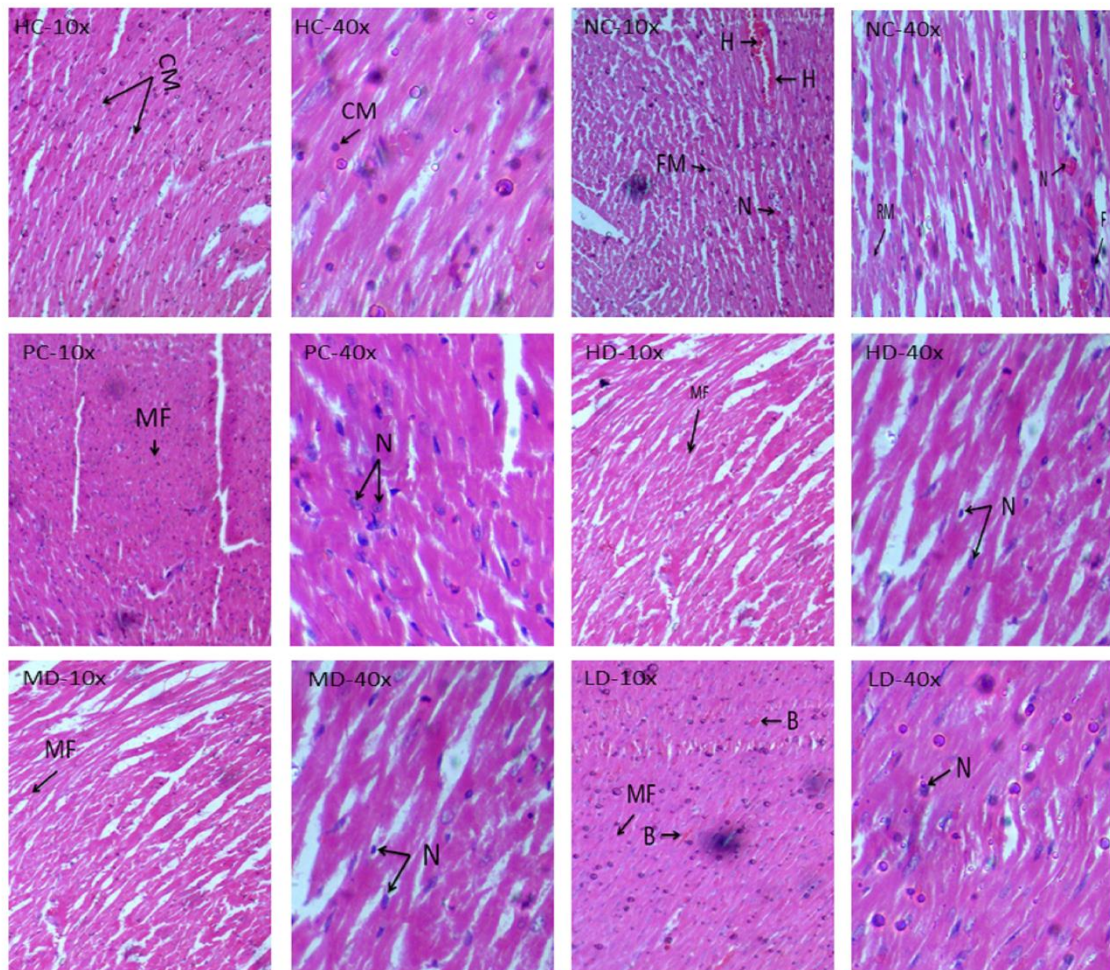

Histology of heart
